# Supplementary material for: High detectivity ternary near-infrared organic photodetectors based on double electron transport layer for health monitoring
Source: Royal Society of Chemistry journal article supplement (doi:10.1039/d4tc04940c), 2025-01-01
Supplement: d4tc04940c1.pdf [file d4tc04940c1.pdf]

## Supplementary Information

### High Detectivity Ternary Near-Infrared Organic Photodetectors Based on Double Electron Transport Layer for Health Monitoring

Jingchong Liang<sup>a,b</sup>, Honglin Wang<sup>a,b</sup>, Zhangmin Yin<sup>a,b</sup>, Mengwei Jia<sup>a,b</sup>, Minghao Wang<sup>a,b</sup>, Dawei Yan<sup>c</sup>, Xiaoya Hou<sup>\*a,b</sup>, and Jie Zhang<sup>a,b</sup>

- a School of Mechanical Engineering, Jiangnan University, Wuxi 214122, People's Republic of China
- b Jiangsu Key Laboratory of Advanced Food Manufacturing Equipment and Technology, Jiangnan University, Wuxi 214122, People's Republic of China
- c School of Internet of Things Engineering, Jiangnan University, Wuxi 214122, People's Republic of China

### Supplementary Figures

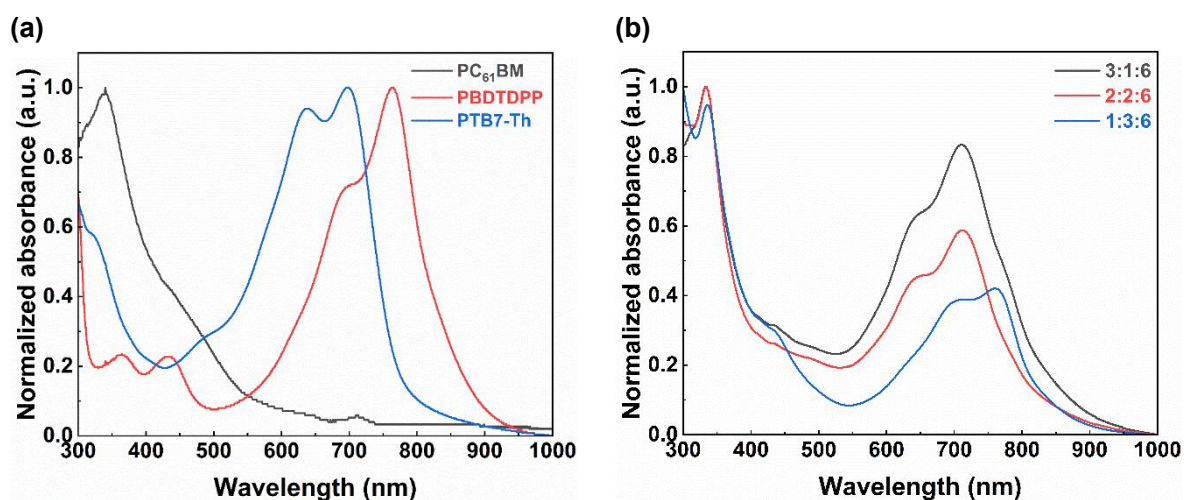

**Fig. S1.** Absorption spectra of (a) pure-film, and (b) ternary blend films with different D<sub>1</sub>:D<sub>2</sub>:A ratios.

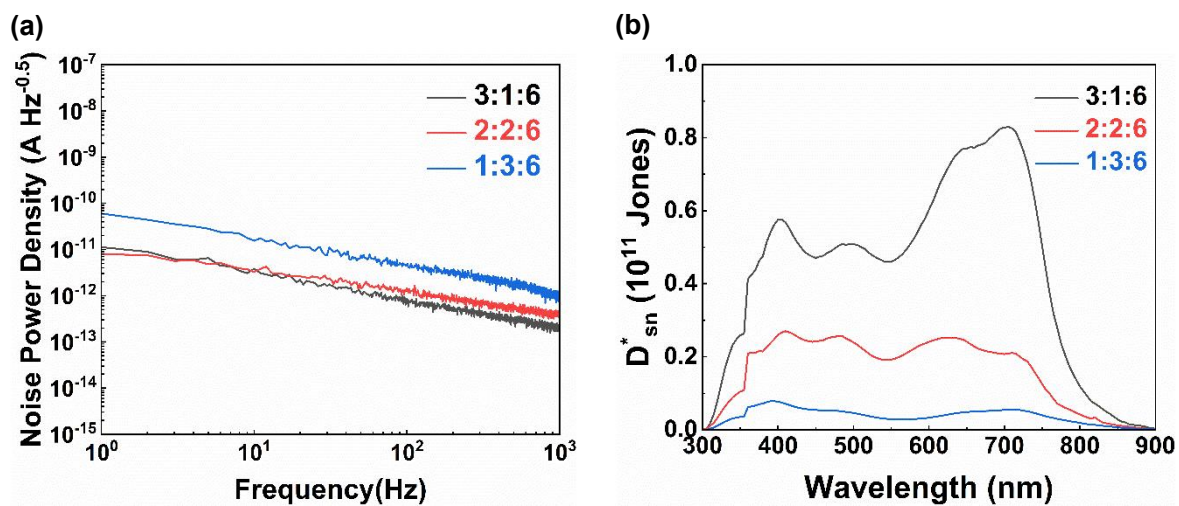

Fig. S2. (a)  $S_n$  and (b)  $D^*_{sn}$  of devices at  $-0.1V$ .

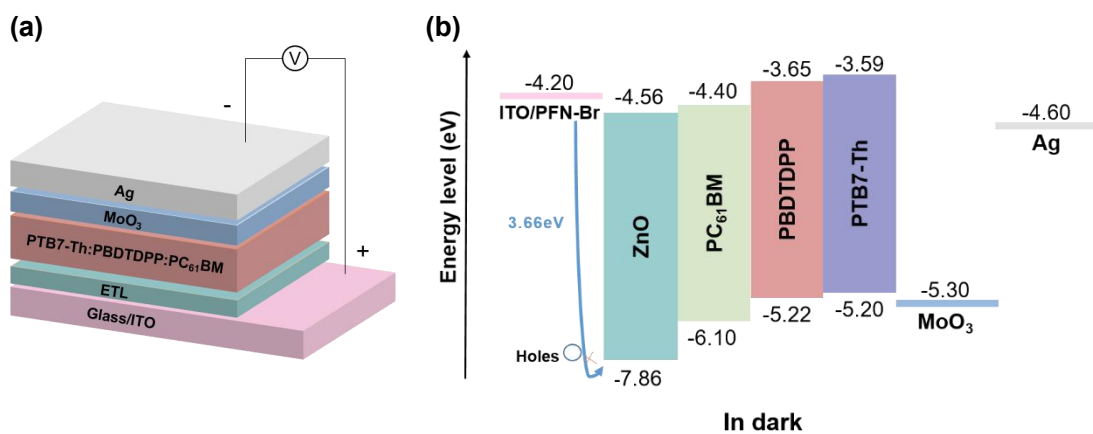

Fig. S3. (a) Device architecture of the different ETL devices. (b) Energy levels of the PFN-Br/ZnO device.

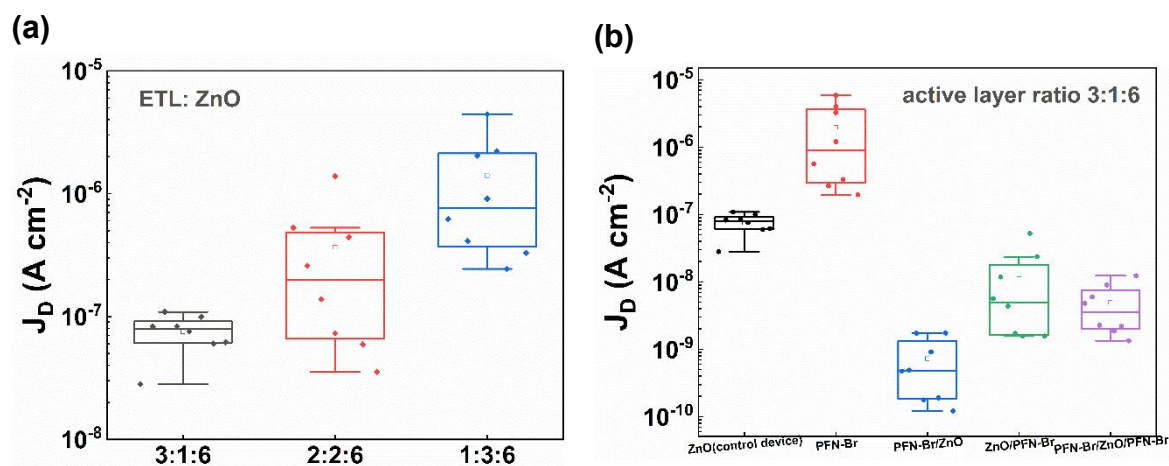

**Fig. S4.** The boxplot of  $J_D$  of OPDs: (a) with different active layer ratios using ZnO as the ETL, and (b) with different ETL at an active layer ratio of 3:1:6 under  $-0.1$  V bias.

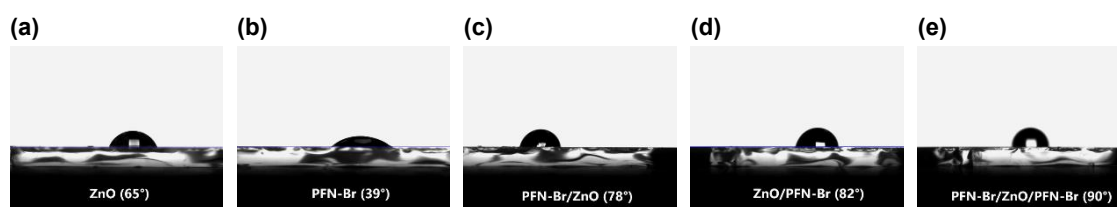

**Fig. S5.** Contact angles of different ETLs. (a) ZnO, (b) PFN-Br, (c) PFN-Br/ZnO, (d) ZnO/PFN-Br and (e) PFN-Br/ZnO/PFN-Br.

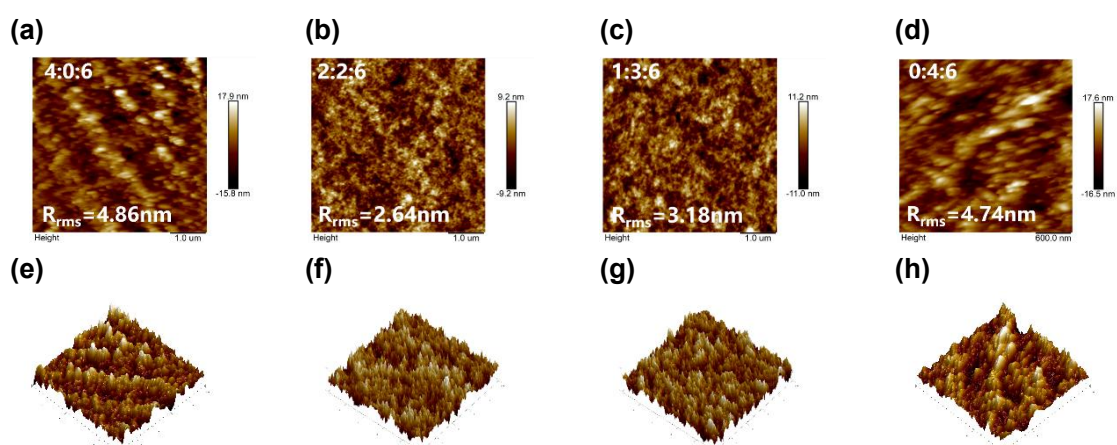

**Fig. S6.** AFM height images of the active layer on the (a) 4:0:6 device, (b) 2:2:6 device, (c) 1:3:6 device and (d) 0:4:6 device. 3D AFM diagrams of active layer on the (e) 4:0:6 device, (f) 2:2:6 device, (g) 1:3:6 device, and (h) 0:4:6 device.

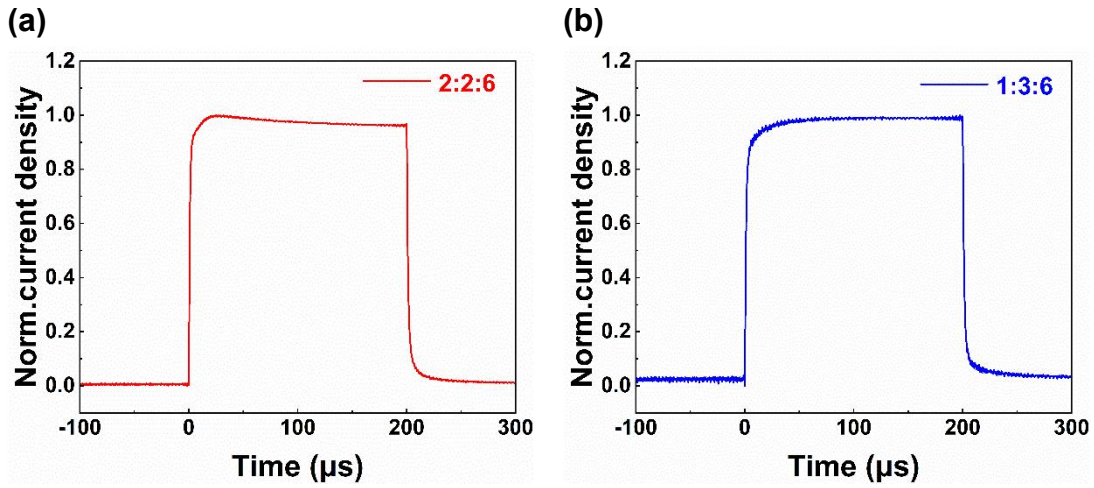

Fig. S7. TPC curves of the (a) 2:2:6 device and (b) 1:3:6 device.

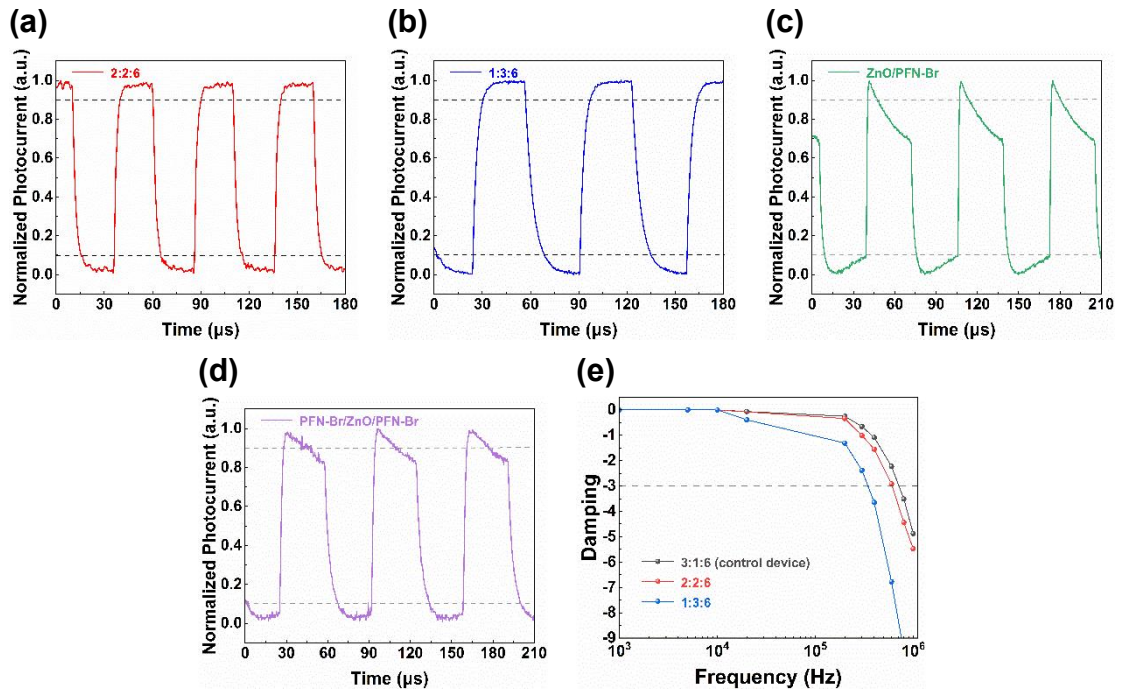

Fig. S8. Transient response of the (a) 2:2:6 device (b) 1:3:6 device (c) ZnO/PFN-Br device (d) PFN-Br/ZnO/PFN-Br device under the illumination of 705 nm LED. (e)  $f_{-3dB}$  curves of different  $D_1:D_2:A$  ratio devices at 0 V under white light irradiation of 100 mW cm<sup>-2</sup> LED.

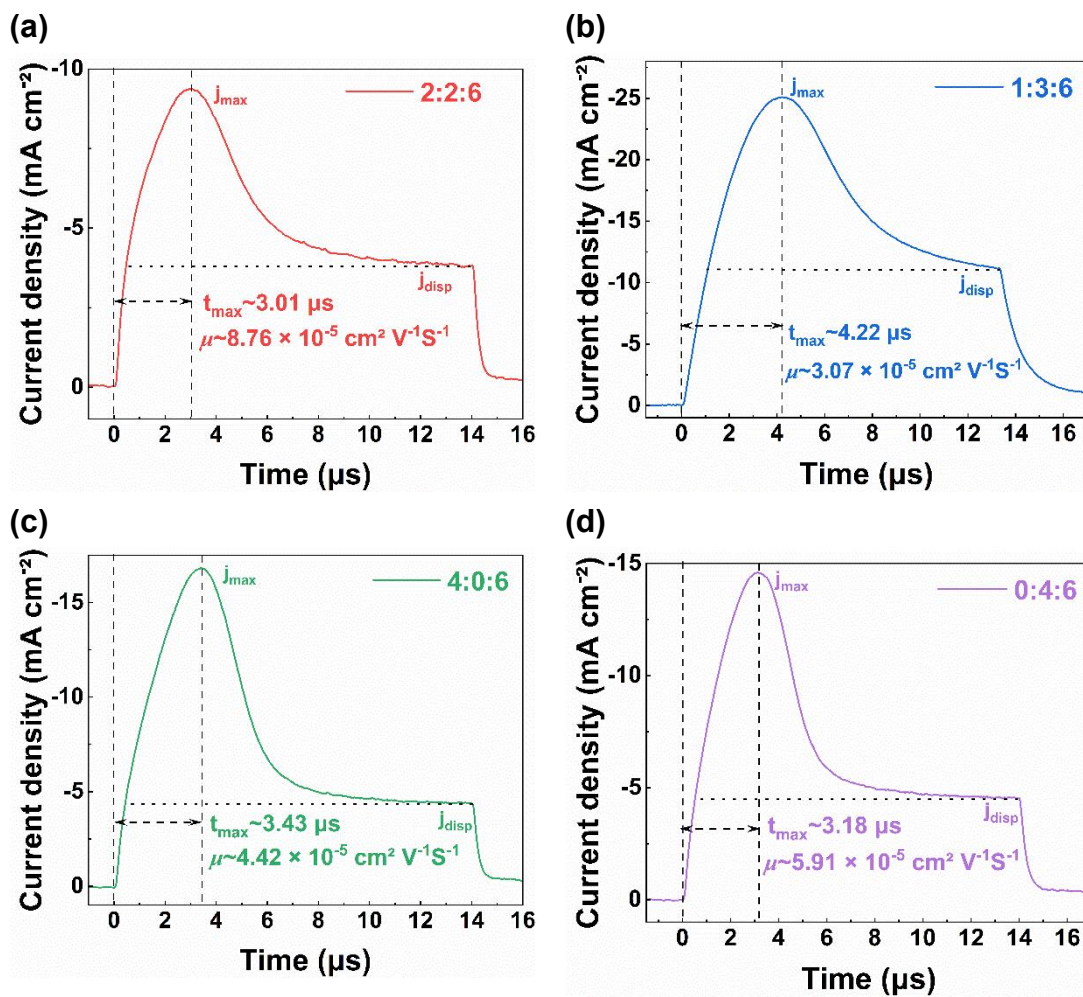

**Fig. S9.** Photo-CELIV curves of the (a) 2:2:6 device (b) 1:3:6 device (c) 4:0:6 device and (d) 0:4:6 device.

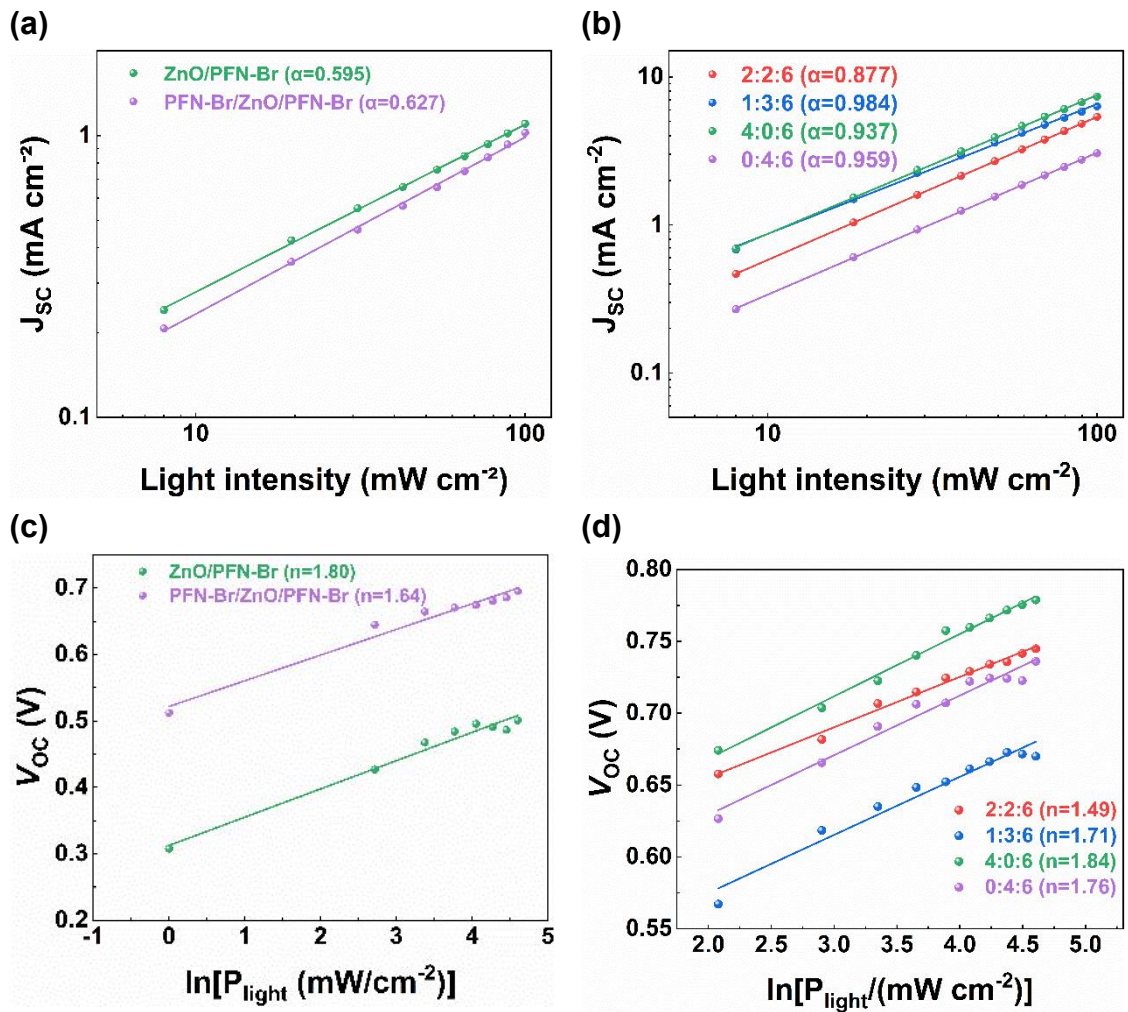

**Fig. S10.**  $J_{sc}$ - $P_{light}$  curves of the (a) ZnO/PFN-Br, PFN-Br/ZnO/PFN-Br devices and (b) 2:2:6, 1:3:6, 4:0:6, and 0:4:6 devices.  $V_{oc}$ - $P_{light}$  curves of the (c) ZnO/PFN-Br, PFN-Br/ZnO/PFN-Br devices and the (e) 2:2:6, 1:3:6, 4:0:6 and 0:4:6 devices.

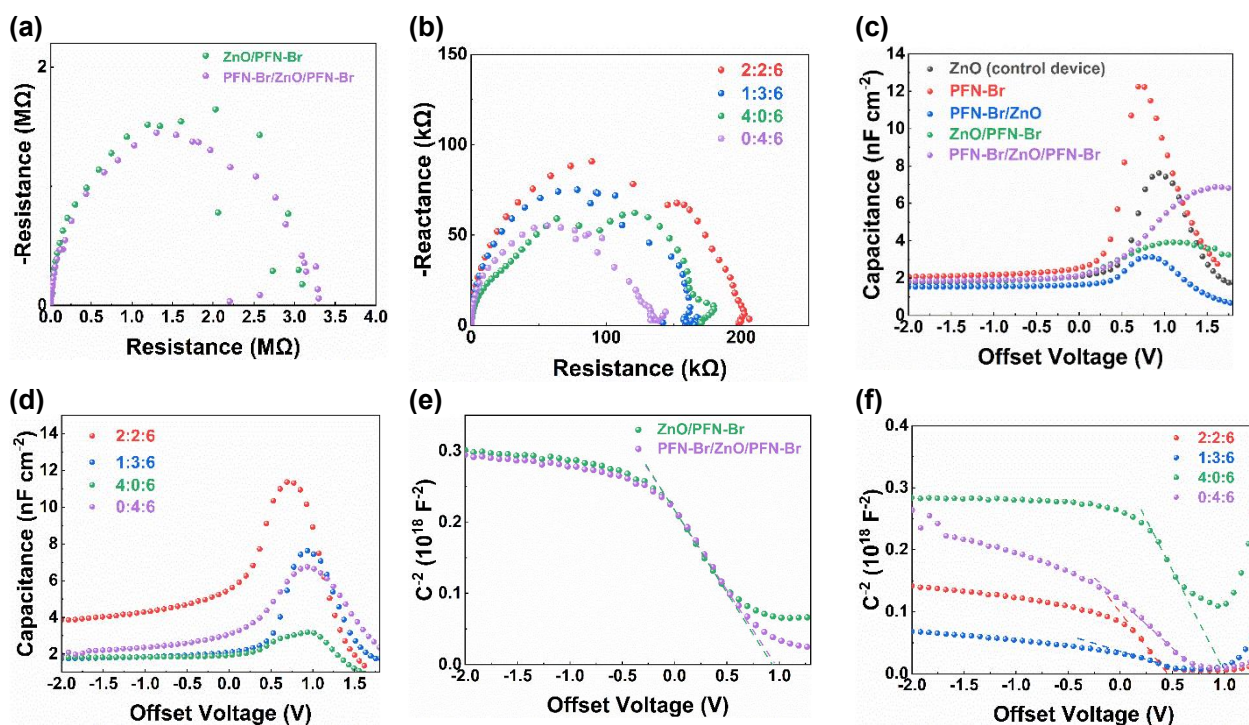

**Fig. S11.** Nyquist curves of the (a) ZnO/PFN-Br, PFN-Br/ZnO/PFN-Br devices, (b) 2:2:6, 1:3:6, 4:0:6 and 0:4:6 devices.  $C-V$  curves of the (c) different ETL devices and the (d) 2:2:6, 1:3:6, 4:0:6 and 0:4:6 devices.  $1/C^2-V$  characteristic curves (dashed line indicates linear fit) of the (e) ZnO/PFN-Br, PFN-Br/ZnO/PFN-Br devices and (f) 2:2:6, 1:3:6, 4:0:6 and 0:4:6 devices.

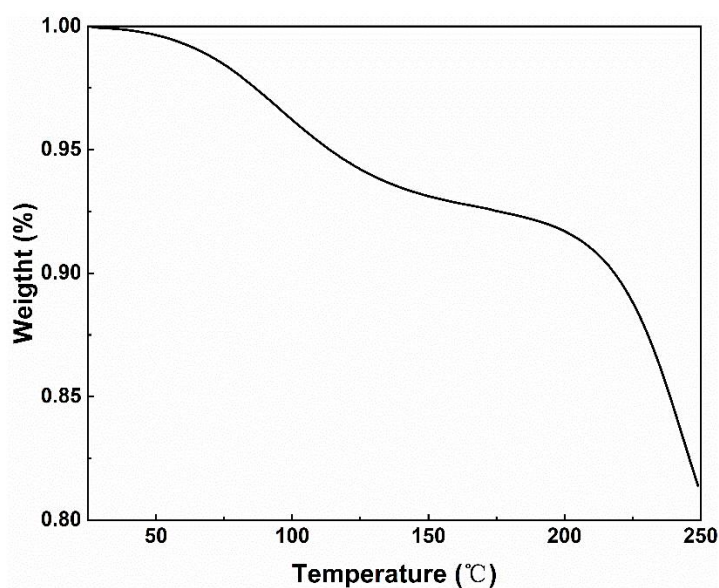

**Fig. S12.** TGA curve of PFN-Br.

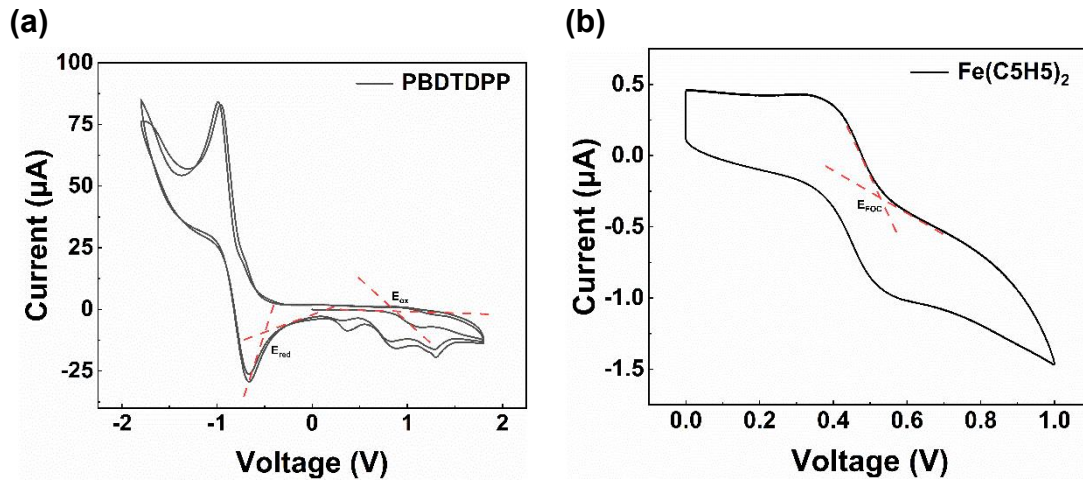

**Fig. S13.** Cyclic voltammogram of PBDTDPP in acetonitrile solution.  $HOMO = -4.8 + E_{Foc} - E_{ox}$  (eV);  $LUMO = -4.8 + E_{Foc} - E_{red}$  (eV).<sup>[1]</sup>

The  $HOMO$  ( $-5.22$  eV) and  $LUMO$  ( $-3.65$  eV) of PBDTDPP was tested using cyclic voltammetry.

Table S1. Main performance parameters of OPDs with different active layer ratios at 705 nm.

| Device (D <sub>1</sub> :D <sub>2</sub> :A) | Bias [V] | $J_D$ [A cm <sup>-2</sup> ] | $EQE$ [%] | $R$ [A W <sup>-1</sup> ] | $D^*_{shot}$ [Jones]  |
|--------------------------------------------|----------|-----------------------------|-----------|--------------------------|-----------------------|
| 3:1:6                                      | -0.1     | $2.81 \times 10^{-8}$       | 32.6      | 0.186                    | $1.95 \times 10^{12}$ |
| 2:2:6                                      | -0.1     | $3.54 \times 10^{-8}$       | 17.3      | 0.098                    | $8.89 \times 10^{11}$ |
| 1:3:6                                      | -0.1     | $3.30 \times 10^{-7}$       | 10.8      | 0.061                    | $1.85 \times 10^{11}$ |
| 4:0:6                                      | -0.1     | $1.44 \times 10^{-7}$       | 32.8      | 0.187                    | $8.01 \times 10^{11}$ |
| 0:4:6                                      | -0.1     | $2.91 \times 10^{-7}$       | 4         | 0.023                    | $6.81 \times 10^{10}$ |

Table S2. Summary of performance parameters of recent high-performance OPDs

| Device Structure                                                       | $R$ [A W <sup>-1</sup> ] | $J_D$ [A cm <sup>-2</sup> ] | $D^*_{shot}$ [Jones]  | $D^*_{sn}$ [Jones]    | Ref |
|------------------------------------------------------------------------|--------------------------|-----------------------------|-----------------------|-----------------------|-----|
| ITO/ZnO/P3HT:<br>IDT-BOC/MoO <sub>3</sub> /Ag                          | 0.29 (560 nm)            | $4.91 \times 10^{-6}$       | $1.34 \times 10^{11}$ | /                     | [2] |
| ITO/ZnO/TQ-3T:<br>IEICO-4F/MoO <sub>3</sub> /Ag                        | 0.05 (1200 nm)           | $2.3 \times 10^{-6}$        | /                     | $1.03 \times 10^{10}$ | [3] |
| ITO/PEDOT:PSS/PM6:<br>Y6/PDINN/Ag                                      | 0.50 (830 nm)            | $7.07 \times 10^{-10}$      | $3.35 \times 10^{13}$ | /                     | [4] |
| ITO/PEDOT:PSS/<br>D18:Y6/Phen-NaDPO/<br>Ag                             | 0.68 (850 nm)            | $1.28 \times 10^{-9}$       | $6.35 \times 10^{13}$ | $6.80 \times 10^{10}$ | [5] |
| ITO/ZnO/PM6:<br>ABTPV-S/MoO <sub>3</sub> /Ag                           | 0.41 (820 nm)            | $1.80 \times 10^{-9}$       | $1.73 \times 10^{13}$ | $5.22 \times 10^{11}$ | [6] |
| ITO/PEDOT: PSS/<br>PTB7-Th:<br>COTCN2 <sup>a</sup> /C60-bissalt/<br>Al | 0.23 (1000 nm)           | $1.08 \times 10^{-7}$       | $1.18 \times 10^{12}$ | $1.33 \times 10^{11}$ | [7] |
| ITO/ZnO/PTQ10:IDSe/<br>MoO <sub>3</sub> /Ag                            | 0.37 (770 nm)            | $1.65 \times 10^{-9}$       | /                     | $3 \times 10^{12}$    | [8] |



|                                                                                    |                |                        |                       |                       |                  |
|------------------------------------------------------------------------------------|----------------|------------------------|-----------------------|-----------------------|------------------|
| ITO/Co <sub>3</sub> O <sub>4</sub> /P3HT:<br>PC <sub>61</sub> BM/Al                | 0.3 (600 nm)   | 2.5×10 <sup>-9</sup>   | 1.08×10 <sup>13</sup> | /                     | [9]              |
| ITO-Cl/CD1:PBN-14/L<br>iF/Al                                                       | 0.304 (670 nm) | 9.03×10 <sup>-10</sup> | 1.79×10 <sup>13</sup> | 2.31×10 <sup>12</sup> | [10]             |
| ITO/ZnO/PM6:PDTTIC<br>-4F/MoO <sub>3</sub> /Ag                                     | 0.55 (900 nm)  | 1.64×10 <sup>-9</sup>  | 2.40×10 <sup>13</sup> | /                     | [11]             |
| ITO/PFN-Br/ZnO/<br>PTB7-Th:<br>PBDTDP:PC <sub>61</sub> BM/<br>MoO <sub>3</sub> /Ag | 0.203 (705 nm) | 4.72×10 <sup>-10</sup> | 1.65×10 <sup>13</sup> | 2.97×10 <sup>11</sup> | <b>This work</b> |

Table S3. Parameters derived from photo-celiv curves and charge recombination analysis.

| Device (D <sub>1</sub> :D <sub>2</sub> :A) | $J_{max}$ [mA cm <sup>-2</sup> ] | $\mu$ [cm <sup>-3</sup> ] | $\alpha$ | $n$  |
|--------------------------------------------|----------------------------------|---------------------------|----------|------|
| 3:1:6 (control device)                     | -12.4                            | 1.14 × 10 <sup>-4</sup>   | 0.967    | 1.33 |
| 2:2:6                                      | -9.37                            | 8.76 × 10 <sup>-5</sup>   | 0.877    | 1.49 |
| 1:3:6                                      | -25.1                            | 3.07 × 10 <sup>-4</sup>   | 0.984    | 1.71 |
| 4:0:6                                      | -16.8                            | 4.42 × 10 <sup>-5</sup>   | 0.937    | 1.84 |
| 0:4:6                                      | -14.5                            | 5.91 × 10 <sup>-5</sup>   | 0.959    | 1.76 |

Table S4. Parameters of Mott–Schottky analysis and Nyquist curves.

| Device (D <sub>1</sub> :D <sub>2</sub> :A) | $N_A$ [cm <sup>-3</sup> ] | $W$ [nm, -0.1V] | $R_{sh}$ [MΩ] |
|--------------------------------------------|---------------------------|-----------------|---------------|
| 3:1:6 (control device)                     | 1.56×10 <sup>16</sup>     | 134             | 0.59          |
| 2:2:6                                      | 3.12×10 <sup>16</sup>     | 76              | 0.2           |
| 1:3:6                                      | 1.24×10 <sup>17</sup>     | 45              | 0.16          |
| 4:0:6                                      | 2.58×10 <sup>16</sup>     | 116             | 0.17          |
| 0:4:6                                      | 4.64×10 <sup>16</sup>     | 78              | 0.14          |

## References

- [1] T.-Y. Wu, R.-B. Sheu and Y. Chen, *Macromolecules*, 2004, **37**, 725–733.
- [2] L. Lv, J. Yu, X. Sui, J. Wu, X. Dong, G. Lu, X. Liu, A. Peng, and H. Huang, *J. Mater. Chem. C.*, 2019, **7**, 5739-5747.
- [3] P. Jacoutot, A. D. Scaccabarozzi, D. Nodari, J. Panidi, Z. Qiao, A. Schiza, A. D. Nega, A. Dimitrakopoulou-Strauss, V. G. Gregoriou, M. Heeney, C. L. Chochos, A. A. Bakulin and N. Gasparini, *Sci. Adv.*, 2023, **9**, eadh2694.
- [4] Z. Yang, B. G. Kim, W. Jang and D. H. Wang, *J. Mater. Chem. C*, 2024, **12**, 3261–3271.
- [5] W. Xu, Y. Gao, K. Qian, B. Wang, R. Xu, M. He, T. Li, G. Xing, S. Yang and G. Wei, *J. Mater. Chem. C*, 2022, **10**, 9391–9400.
- [6] Z. Zhong, X. Liu, L. Li, Z. Han, Y. He, X. Xu, J. Hai, R. Zhu and J. Yu, *Sci. China Chem.*, 2023, **66**, 242–250.
- [7] J. Ha, H. J. Eun, B. Park, H. Ahn, D. R. Hwang, Y. S. Shim, J. Heo, C. Lee, S. C. Yoon, J. H. Kim and S. Ko, *Adv. Funct. Materials*, 2023, **33**, 2211486.
- [8] Z. Qiao, Q. He, A. D. Scaccabarozzi, J. Panidi, A. Marsh, Y. Han, P. Jacoutot, D. Nodari, T. Zhang, A. Way, A. J. P. White, T. D. Anthopoulos, W. C. Tsoi, A. A. Bakulin, M. Heeney, Z. Fei and N. Gasparini, *J. Mater. Chem. C*, 2024, **12**, 5766–5775.
- [9] K. Lu, Y. Gao, Z. Wang, X. Wang and H. Meng, *J. Mater. Chem. C*, 2023, **11**, 8600–8608.
- [10] J. Wang, R. Zhao, L. Zhang, J. Miao, J. Liu and L. Wang, *J. Mater. Chem. C*, 2023, **11**, 14421–14428.

[11] Y. Chen, Y. Zheng, Y. Jiang, H. Fan and X. Zhu, *J. Am. Chem. Soc.*, 2021, **143**, 4281–4289.
